# Supplementary material for: Differences in Perceived and Predicted Bleeding Risk in Older Adults With Atrial Fibrillation: The SAGE‐AF Study
Source: PubMed Central journal article supplement — J Am Heart Assoc. 2021 Aug 16;10(17):e019979. doi: 10.1161/JAHA.120.019979 (PMC8649256; doi:10.1161/jaha.120.019979), 2021-08-16

# **SUPPLEMENTAL MATERIAL**

Figure S1. Distribution of Perceived and Predicted Bleeding Risk: The SAGE-AF Study.

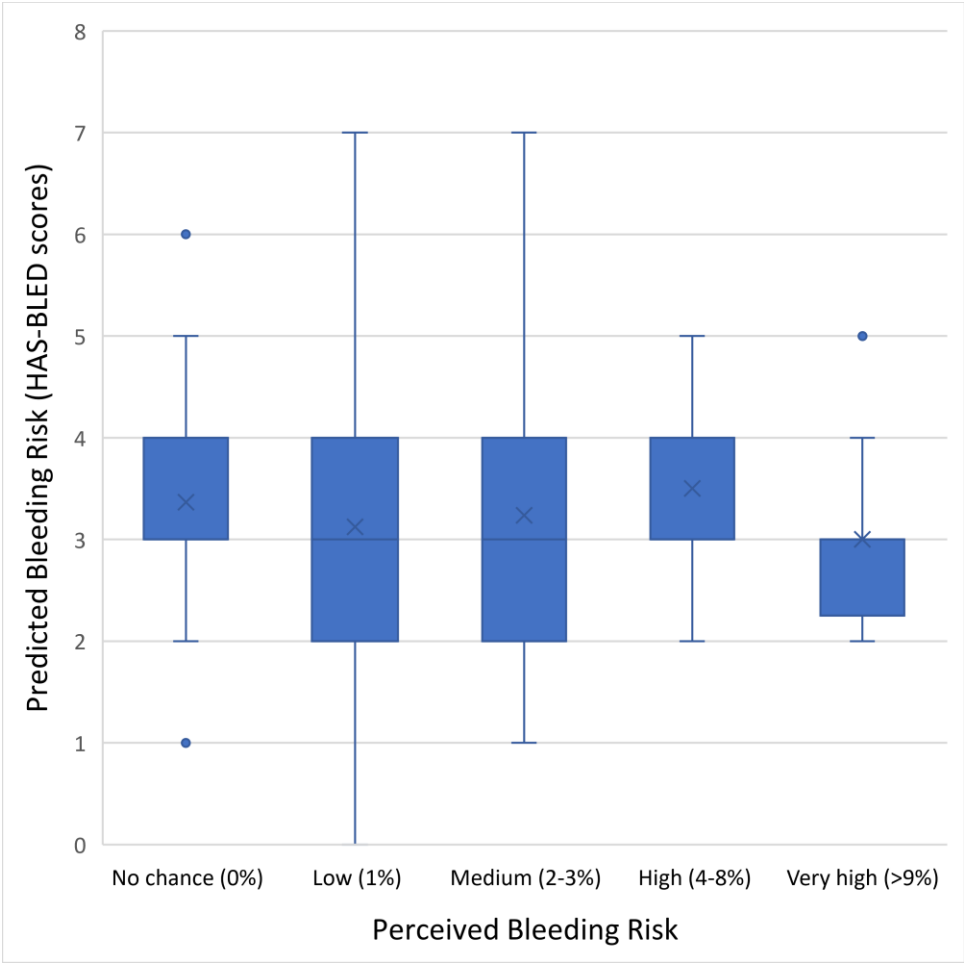

Supplement: JAH3-10-e019979-s001.pdf [file JAH3-10-e019979-s001.pdf]
